# Supplementary material for: Human TH17 cells engage gasdermin E pores to release IL-1α on NLRP3 inflammasome activation
Source: PubMed Central journal article supplement (PMC9892007; doi:10.1038/s41590-022-01386-w), 2023-01-05
Supplement: 41590_2022_1386_MOESM2_ESM.pdf [file 41590_2022_1386_MOESM2_ESM.pdf]

## Reporting Summary

Nature Portfolio wishes to improve the reproducibility of the work that we publish. This form provides structure for consistency and transparency in reporting. For further information on Nature Portfolio policies, see our [Editorial Policies](#) and the [Editorial Policy Checklist](#).

### Statistics

For all statistical analyses, confirm that the following items are present in the figure legend, table legend, main text, or Methods section.

n/a Confirmed

- The exact sample size ( $n$ ) for each experimental group/condition, given as a discrete number and unit of measurement
- A statement on whether measurements were taken from distinct samples or whether the same sample was measured repeatedly
- The statistical test(s) used AND whether they are one- or two-sided  
*Only common tests should be described solely by name; describe more complex techniques in the Methods section.*
- A description of all covariates tested
- A description of any assumptions or corrections, such as tests of normality and adjustment for multiple comparisons
- A full description of the statistical parameters including central tendency (e.g. means) or other basic estimates (e.g. regression coefficient) AND variation (e.g. standard deviation) or associated estimates of uncertainty (e.g. confidence intervals)
- For null hypothesis testing, the test statistic (e.g.  $F$ ,  $t$ ,  $r$ ) with confidence intervals, effect sizes, degrees of freedom and  $P$  value noted  
*Give  $P$  values as exact values whenever suitable.*
- For Bayesian analysis, information on the choice of priors and Markov chain Monte Carlo settings
- For hierarchical and complex designs, identification of the appropriate level for tests and full reporting of outcomes
- Estimates of effect sizes (e.g. Cohen's  $d$ , Pearson's  $r$ ), indicating how they were calculated

*Our web collection on [statistics for biologists](#) contains articles on many of the points above.*

### Software and code

Policy information about [availability of computer code](#)

Data collection

BD FACSAriaTM III (BD Biosciences), BD FACSAriaTM Fusion (BD Biosciences), BD LSRFortessa (BD Biosciences), CytoFLEX Flow Cytometer (Beckman Coulter), MACSQuant Analyzer (Miltenyi Biotec), ImageStream<sup>®</sup>X Mk II imaging flow cytometer (AMNIS<sup>®</sup>; MERCK Millipore), Odyssey Imaging system (LI-COR Biosciences), Jess System (ProteinSimple)

Data analysis

All the software and their version information, when available, are shown. FlowJo (always latest version up to 10.6.1 upon completion of the study) was used for FACS analyses. Scripts for bioinformatic analyses were written by Albert Garcia and Gianni Panagiotou (coauthors) and Sivia Fibi-Smetana and Leila Taher. Codes have been deposited publicly (Github and Zenodo) as indicated in the manuscript (Code availability statement). GraphPad Prism (v.7-9) was used to analyze data and to create plots. INSPIRE software, IDEAS software 6.2.64.0, Image Studio<sup>™</sup> Lite (LI-COR Biosciences) 5.0, Compass software 6.0.0 (ProteinSimple), R version 4.1.

For manuscripts utilizing custom algorithms or software that are central to the research but not yet described in published literature, software must be made available to editors and reviewers. We strongly encourage code deposition in a community repository (e.g. GitHub). See the Nature Portfolio [guidelines for submitting code & software](#) for further information.

## Data

Policy information about [availability of data](#)

All manuscripts must include a [data availability statement](#). This statement should provide the following information, where applicable:

- Accession codes, unique identifiers, or web links for publicly available datasets
- A description of any restrictions on data availability
- For clinical datasets or third party data, please ensure that the statement adheres to our [policy](#)

Raw and processed Sequencing Data files are available GEO. All accession numbers are provided in the manuscript. All data points for the remaining experiments are shown in the paper. All data points represent individual biological samples as indicated in the legends.

## Field-specific reporting

Please select the one below that is the best fit for your research. If you are not sure, read the appropriate sections before making your selection.

- Life sciences       Behavioural & social sciences       Ecological, evolutionary & environmental sciences

For a reference copy of the document with all sections, see [nature.com/documents/nr-reporting-summary-flat.pdf](https://www.nature.com/documents/nr-reporting-summary-flat.pdf)

## Life sciences study design

All studies must disclose on these points even when the disclosure is negative.

|                 |                                                                                                                                                                                                                                                                                     |
|-----------------|-------------------------------------------------------------------------------------------------------------------------------------------------------------------------------------------------------------------------------------------------------------------------------------|
| Sample size     | The sample sizes are indicated in the respective figures with circles (in bar graphs) indicating individual donors and experiments. Sample sizes were based on our experience and common practice in the field of human immunology (i.e. Nat Immunol. 2018 Oct; 19(10): 1126–1136.) |
| Data exclusions | no data exclusions                                                                                                                                                                                                                                                                  |
| Replication     | Each data point indicates an independent blood donor. Multiple blood donors and experiments were performed to confirm the conclusions. The individual data points, which correlate with independent blood donors are shown in the respective graphs.                                |
| Randomization   | Healthy donor blood from men and women (anonymous) was used. Patient samples (JIA) were provided solely based on the diagnosis.                                                                                                                                                     |
| Blinding        | Blinding was not relevant for this study. For JIA patients blood collection, experiment and data analysis were done by three independent groups, respectively.                                                                                                                      |

## Reporting for specific materials, systems and methods

We require information from authors about some types of materials, experimental systems and methods used in many studies. Here, indicate whether each material, system or method listed is relevant to your study. If you are not sure if a list item applies to your research, read the appropriate section before selecting a response.

### Materials & experimental systems

| n/a                                 | Involved in the study                                           |
|-------------------------------------|-----------------------------------------------------------------|
| <input type="checkbox"/>            | <input checked="" type="checkbox"/> Antibodies                  |
| <input type="checkbox"/>            | <input checked="" type="checkbox"/> Eukaryotic cell lines       |
| <input checked="" type="checkbox"/> | <input type="checkbox"/> Palaeontology and archaeology          |
| <input checked="" type="checkbox"/> | <input type="checkbox"/> Animals and other organisms            |
| <input type="checkbox"/>            | <input checked="" type="checkbox"/> Human research participants |
| <input checked="" type="checkbox"/> | <input type="checkbox"/> Clinical data                          |
| <input checked="" type="checkbox"/> | <input type="checkbox"/> Dual use research of concern           |

### Methods

| n/a                                 | Involved in the study                              |
|-------------------------------------|----------------------------------------------------|
| <input checked="" type="checkbox"/> | <input type="checkbox"/> ChIP-seq                  |
| <input type="checkbox"/>            | <input checked="" type="checkbox"/> Flow cytometry |
| <input checked="" type="checkbox"/> | <input type="checkbox"/> MRI-based neuroimaging    |

## Antibodies

|                 |                                                                                                                                                                                                                                                                                                                                                                                                    |
|-----------------|----------------------------------------------------------------------------------------------------------------------------------------------------------------------------------------------------------------------------------------------------------------------------------------------------------------------------------------------------------------------------------------------------|
| Antibodies used | Antigen; conjugate (if applicable); dilution; clone; vendor; Order number<br>FACS/Imaging flow cytometry<br>ASC; PE; 1:50; HASC-71; Biolegend; 653904<br>CCR4; PE/Cy7; 1:200; L291H4; Biolegend; 359410<br>CCR6; PE; 1:50; 11A9; BD; 559562<br>CD14; PacificBlue; 1:200-1:400; HCD14; Biolegend; 325616<br>CD3; FITC; 1:150; UCHT1; Biolegend; 300440<br>CD3; APC; 1:100; UCHT1; Biolegend; 300412 |
|-----------------|----------------------------------------------------------------------------------------------------------------------------------------------------------------------------------------------------------------------------------------------------------------------------------------------------------------------------------------------------------------------------------------------------|

CD45RA; FITC; 1:200; HI100; Biolegend; 304106  
 CD8; PacificBlue; 1:100; SK1; Biolegend; 344718  
 CXCR3; APC; 1:10; 1C6/CXCR3; BD; 550967  
 IFN- $\gamma$ ; APC/Cy7; 1:300; 4S.B3; Biolegend; 502530  
 IL-10; PE/Cy7; 1:50; JES3-9D7; Biolegend; 501420  
 IL-10; APC; 1:50; JES3-9D7; BD ; 554707  
 IL-10; PE; 1:10; JES3-9D7; BD; 559330  
 IL-17A; PacificBlue; 1:100; BL168; Biolegend; 512312  
 IL-1a; PE; 1:50; 364-3B3-14; Biolegend; 500106  
 IL-1R1; PE; 1:20; FAB269P; R&D; FAB269P-100  
 IL-4; FITC; 1:600; MP4-25D2; Biolegend; 500807  
 Ki-67; Brilliant Violet 421; 1:10; Ki-67; Biolegend; 350506  
 NALP3/NLRP3; APC; 1:50; REA668; Miltenyi; 130-111-210  
 RORyt; APC; 1:10; AFKJS-9; eBioscience; 17-6988-82  
 IL-1b; Alexa Fluor 647; 1:50; JK1B-1; Biolegend; 508207  
 CCR7; PE; 1:50; G043H7; Biolegend; 353203  
 CD25; BV421; 1:100; BC96; Biolegend; 302640  
 Western blot /Jess  
 caspase 8; 1:50 (Jess) 1:1000 (WB); 1C12; Cell signaling; 9746T;  
 caspase 1; 1:1000 (WB); polyclonal; Cell signaling; 2225S  
 b-actin; 1:2000 (WB) 1:200 (Jess); 8H10D10; Cell signaling; 3700S  
 caspase-3; 1:1000 (WB) 1:50 (Jess); polyclonal; Cell signaling; 9662  
 gasdermin D; 1:1000 (WB) 1:50 (Jess); polyclonal; Cell signaling; 96458  
 cleaved gasdermin D; 1:50 (Jess) 1:1000(WB); E7H9G; Cell signaling; 36425S  
 NLRP3; 1:2000 (WB); D2P5E; Cell signaling; 13158S  
 Mouse IgG; HRP; 1:2000 (WB); polyclonal; Cell signaling; 7076  
 Rabbit IgG; HRP; 1:2000 (WB); polyclonal; Cell signaling; 7074  
 IL-1 $\alpha$ ; 1:1000 (WB); EPR5103(2); Abcam; ab134908  
 gasdermin E; 1:50 (Jess) 1:500 (WB); EPR19859; Abcam; ab215191;  
 Sodium Potassium ATPase; 1:50 (Jess); EP1845Y; Abcam; ab76020  
 GAPDH; 1:1000 (WB) 1:100 (Jess); 6C5; MERCK; CB1001  
 ASC; 1:50 (Jess); B-3; Santa Cruz Biotechnology; sc-514414  
 NLRP3/NALP3; 1:50 (Jess); 25N10E9; Novus Biologicals; NBP2-03948;  
 Anti mouse detection module; HRP; as per manufacturer's instructions; Protein Simple; DM-002  
 Anti rabbit detection module; HRP; as per manufacturer's instructions; Protein Simple; DM-001

## Validation

## FACS antibodies validation:

Biolegend - <https://www.biolegend.com/en-us/quality/quality-control>

BD - <https://www.biocompare.com/Antibody-Manufacturing/355107-Antibody-Manufacturing-Perspectives-BD-Bioscience/>

Miltenyi Biotec - <https://www.miltenyibiotec.com/DE-en/products/mac3-antibodies/antibody-validation.html#ref>

All FACS antibodies are commercially available and verifications can be found on respective manufacturer's website.

All antibodies have in addition been tested on the cells used herein by performing titrations according to standard recommendations (Eur J Immunol. 2019 Oct;49(10):1457-1973. doi: 10.1002/eji.201970107). They were then used at the concentrations indicated herein and in the methods section of the manuscript.

## Western blot/Jess antibodies validation:

Cell Signaling Technology - <https://www.cellsignal.de/about-us/our-approach-process/antibody-validation-western-blotting>

Abcam - <https://www.abcam.com/primary-antibodies/how-we-validate-our-antibodies#Western%20blot>

NOVUS Biologicals - <https://www.novusbio.com/5-pillars-validation>

Santa Cruz Biotechnology - <https://www.labome.com/method/Santa-Cruz-Antibodies.html>

MERCK - <https://www.sigmaaldrich.com/DE/en/technical-documents/technical-article/protein-biology/immunohistochemistry/antibody-enhanced-validation>

All antibodies have in addition been tested on the cells used herein by performing titrations according to standard recommendations (Eur J Immunol. 2019 Oct;49(10):1457-1973. doi: 10.1002/eji.201970107). They were then used at the concentrations indicated herein and in the methods section of the manuscript.

All western blot antibodies are commercially available and verifications can be found on respective manufacturer's website. In addition, western blot antibodies were validated using genetic strategy: expression of the target protein was compared before and after knockout using CRISPR/Cas9 technology. If protein expression following knockout was substantially reduced, then antibody was considered as specific.

## Eukaryotic cell lines

Policy information about [cell lines](#)

|                                                                      |                                                                                                                                                                                          |
|----------------------------------------------------------------------|------------------------------------------------------------------------------------------------------------------------------------------------------------------------------------------|
| Cell line source(s)                                                  | Allogeneic PBMCs were used as feeder cells and were isolated from healthy donors. T cell lines and T cell clones were generated from primary human cells and kept short term in culture. |
| Authentication                                                       | does not apply                                                                                                                                                                           |
| Mycoplasma contamination                                             | not tested in primary human t cells.                                                                                                                                                     |
| Commonly misidentified lines<br>(See <a href="#">ICLAC</a> register) | does not apply                                                                                                                                                                           |

## Human research participants

Policy information about [studies involving human research participants](#)

|                            |                                                                                                                                                                                                                                                                                                                                                                                                                                                                      |
|----------------------------|----------------------------------------------------------------------------------------------------------------------------------------------------------------------------------------------------------------------------------------------------------------------------------------------------------------------------------------------------------------------------------------------------------------------------------------------------------------------|
| Population characteristics | healthy, men and women, age: 22-65                                                                                                                                                                                                                                                                                                                                                                                                                                   |
| Recruitment                | fresh blood from healthy anonymous blood donors and buffy coats from the blood banks of the Charite Universitätsmedizin Berlin and the Universitätsklinikum Jena were used whenever needed. Clinical blood and synovial fluid samples were obtained from Bas Vastert (University Medical Center Utrecht, Biobank). The recruitment occurred based on diagnosis and the samples were stored in a biobank and selected randomly based on the diagnosis criterium only. |
| Ethics oversight           | The ethics committees of the Charité Universitätsmedizin Berlin, the Technical University of Munich and the Friedrich Schiller University of Jena approved the study with with positive ethics votes.                                                                                                                                                                                                                                                                |

Note that full information on the approval of the study protocol must also be provided in the manuscript.

## Flow Cytometry

### Plots

Confirm that:

- The axis labels state the marker and fluorochrome used (e.g. CD4-FITC).
- The axis scales are clearly visible. Include numbers along axes only for bottom left plot of group (a 'group' is an analysis of identical markers).
- All plots are contour plots with outliers or pseudocolor plots.
- A numerical value for number of cells or percentage (with statistics) is provided.

### Methodology

|                           |                                                                                                                                                                                                                                                                                                                                                                                                                                                                                                                                                                                                                                                 |
|---------------------------|-------------------------------------------------------------------------------------------------------------------------------------------------------------------------------------------------------------------------------------------------------------------------------------------------------------------------------------------------------------------------------------------------------------------------------------------------------------------------------------------------------------------------------------------------------------------------------------------------------------------------------------------------|
| Sample preparation        | Primary cells were isolated as described in the methods (Ficoll isolation, positive magnetic isolation using microbeads, flow-cytometry assisted cell sorting)                                                                                                                                                                                                                                                                                                                                                                                                                                                                                  |
| Instrument                | BD FACSAria, BD LSRFortessa, Cytoflex, Cytex AuroraBD, FACSAriaTM III (BD Biosciences), BD FACSAriaTM Fusion (BD Biosciences), BD LSRFortessa (BD Biosciences), CytoFLEX Flow Cytometer (Beckman Coulter), MACSQuant Analyzer (Miltenyi Biotec)                                                                                                                                                                                                                                                                                                                                                                                                 |
| Software                  | FlowJo Software (Tree Star Inc) for FACS analyses                                                                                                                                                                                                                                                                                                                                                                                                                                                                                                                                                                                               |
| Cell population abundance | Purity of the relevant cell populations was checked after sorting and found to be >98%                                                                                                                                                                                                                                                                                                                                                                                                                                                                                                                                                          |
| Gating strategy           | The gating strategies are shown in the Extended Data Fig. File 3. Lymphocytes were gated by FSC/SSC and exclusion of dead cells by zombie dye, exclusion of doublets as shown, and further gating for CD4+CD14- CD3+ T cells and subgating for memory marker CD45RA- (CD45RA- for memory T cells, CD45RA+ for naive T cells) and the differential expression of chemokine receptors for the respective T helper cell subsets as shown and explained in the methods and the results section. The positive populations were defined with the use of unstained and single-stained controls and normally were above 10 <sup>3</sup> on a log scale. |

- Tick this box to confirm that a figure exemplifying the gating strategy is provided in the Supplementary Information.
