# Supplementary material for: Human TH17 cells engage gasdermin E pores to release IL-1α on NLRP3 inflammasome activation
Source: PubMed Central journal article supplement (PMC9892007; doi:10.1038/s41590-022-01386-w), 2023-01-05
Supplement: 41590_2022_1386_MOESM4_ESM.pdf [file 41590_2022_1386_MOESM4_ESM.pdf]

Supplementary Fig.5

Supplementary Fig.5a

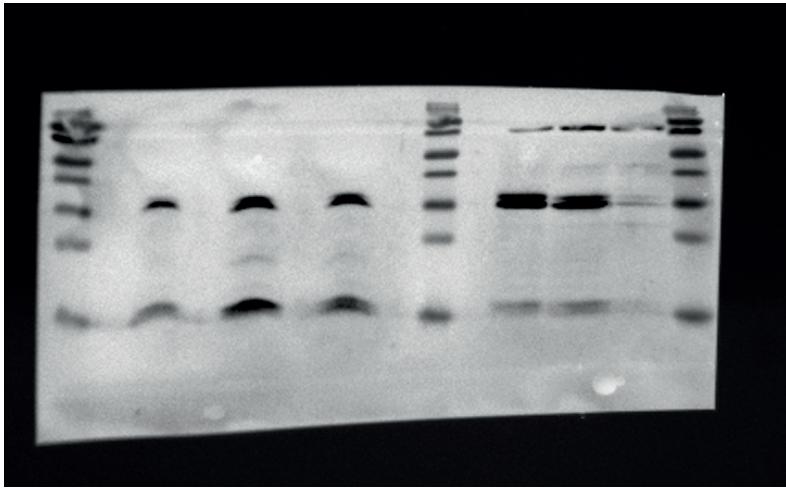

anti-IL-1a

Supplementary Fig.5b

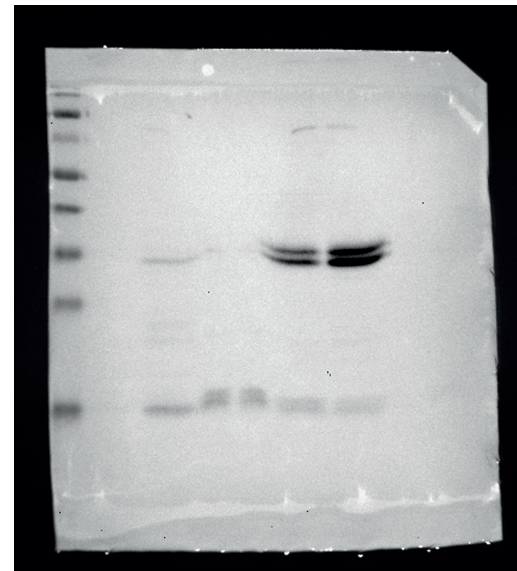

anti-IL-1a

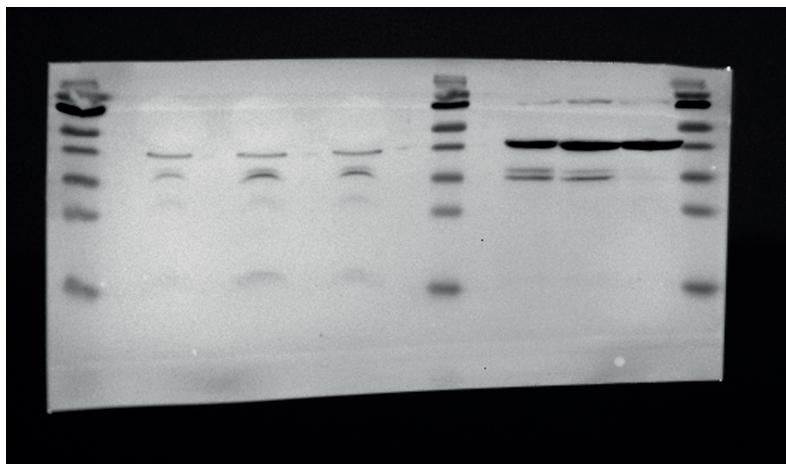

anti-b-actin

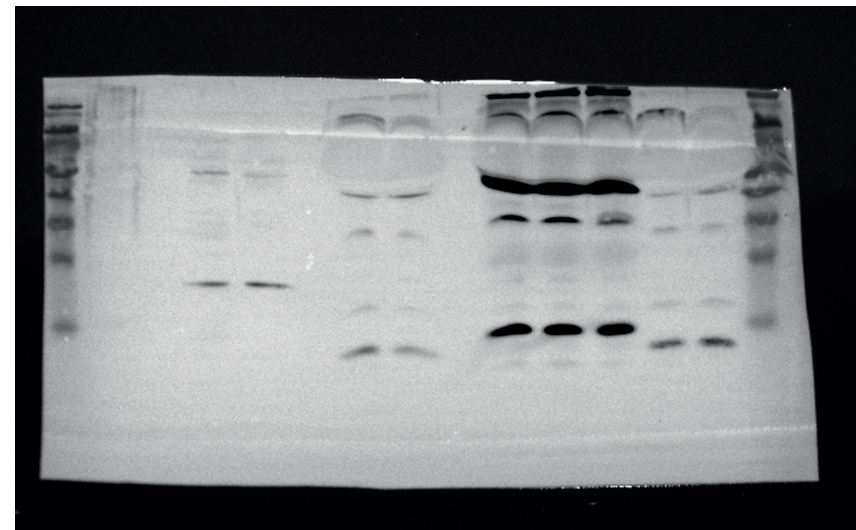

anti-IL-1a
