# Supplementary material for: Human TH17 cells engage gasdermin E pores to release IL-1α on NLRP3 inflammasome activation
Source: PubMed Central journal article supplement (PMC9892007; doi:10.1038/s41590-022-01386-w), 2023-01-05
Supplement: 41590_2022_1386_MOESM13_ESM.pdf [file 41590_2022_1386_MOESM13_ESM.pdf]

Fig. 4

Fig. 4a

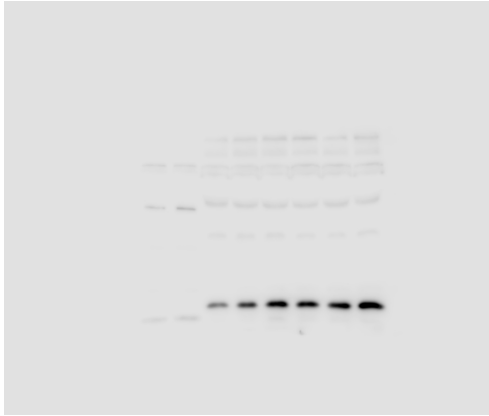

clone lysates

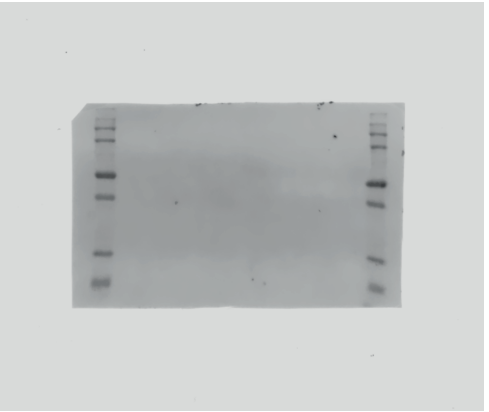

ladder

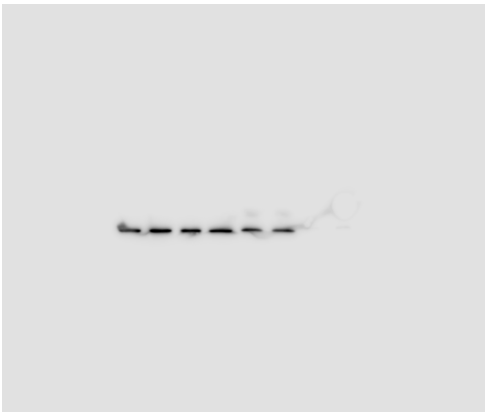

GAPDH

Fig. 4d

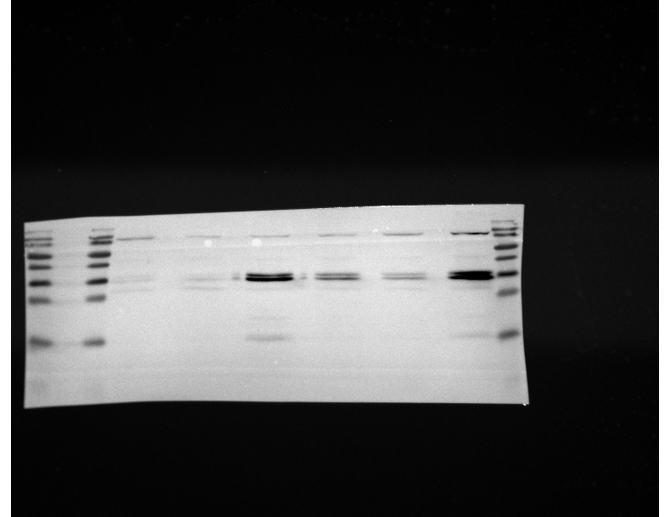

anti-IL-1a

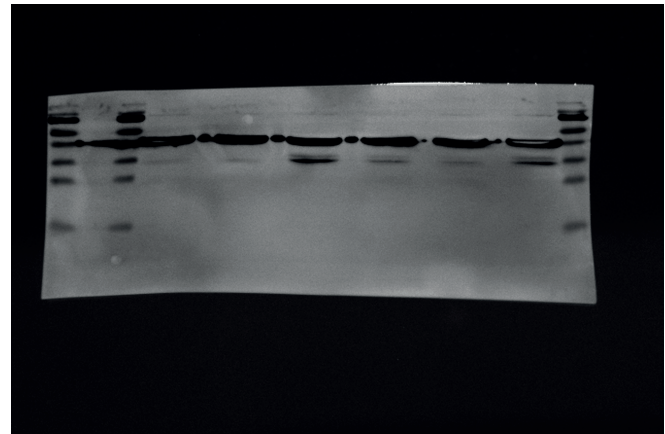

b-actin
