# Supplementary material for: Human TH17 cells engage gasdermin E pores to release IL-1α on NLRP3 inflammasome activation
Source: PubMed Central journal article supplement (PMC9892007; doi:10.1038/s41590-022-01386-w), 2023-01-05
Supplement: 41590_2022_1386_MOESM15_ESM.pdf [file 41590_2022_1386_MOESM15_ESM.pdf]

Fig.6

Fig.6C

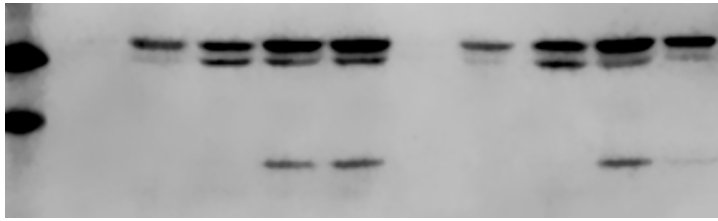

anti-GSDME

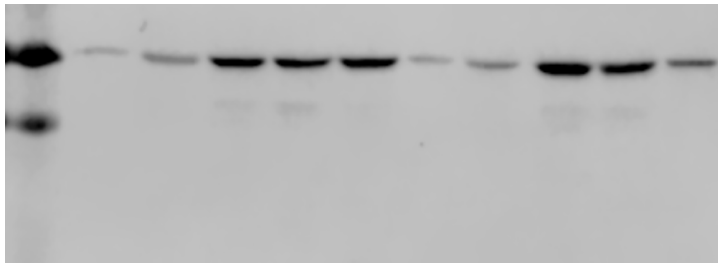

anti-GSDMD

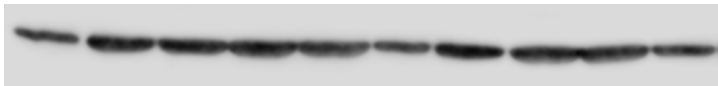

anti-b-actin

Fig.6E

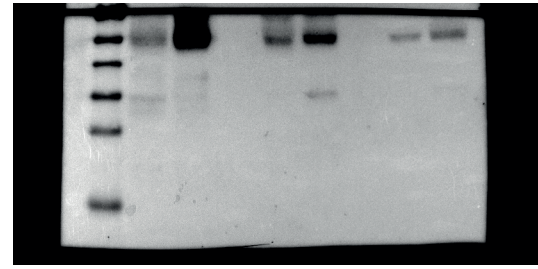

anti-GSDME  
with ladder

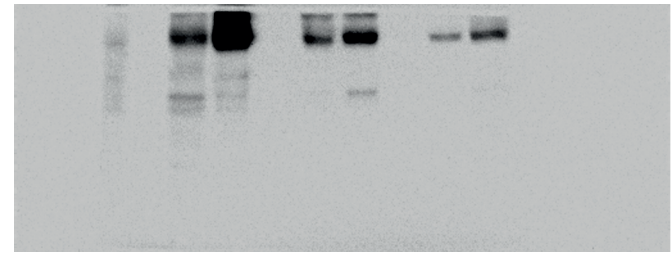

anti-GSDME

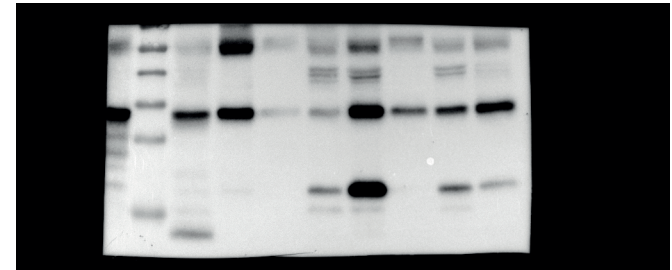

anti-caspase-3  
with ladder

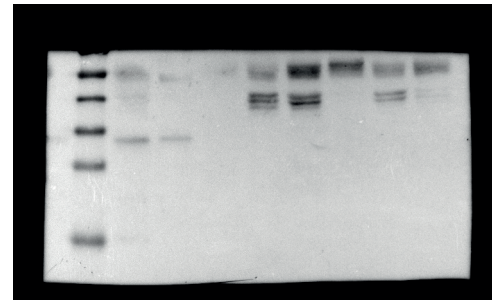

anti-caspase-8  
with ladder

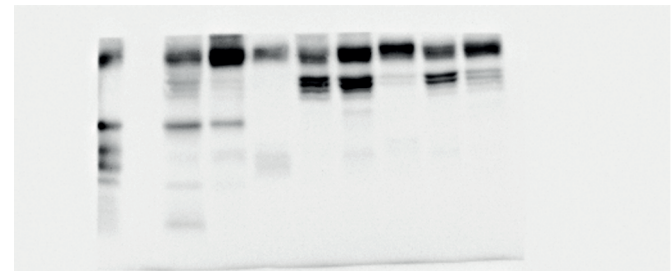

anti-caspase-8

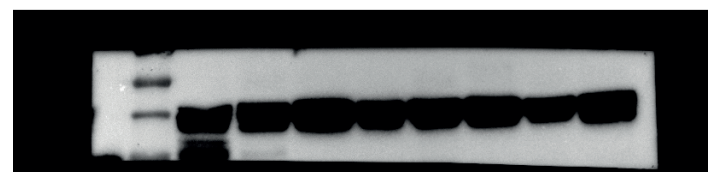

anti-b-actin  
with ladder
