# Supplementary material for: Human TH17 cells engage gasdermin E pores to release IL-1α on NLRP3 inflammasome activation
Source: PubMed Central journal article supplement (PMC9892007; doi:10.1038/s41590-022-01386-w), 2023-01-05
Supplement: 41590_2022_1386_MOESM18_ESM.pdf [file 41590_2022_1386_MOESM18_ESM.pdf]

anti-NLRP3

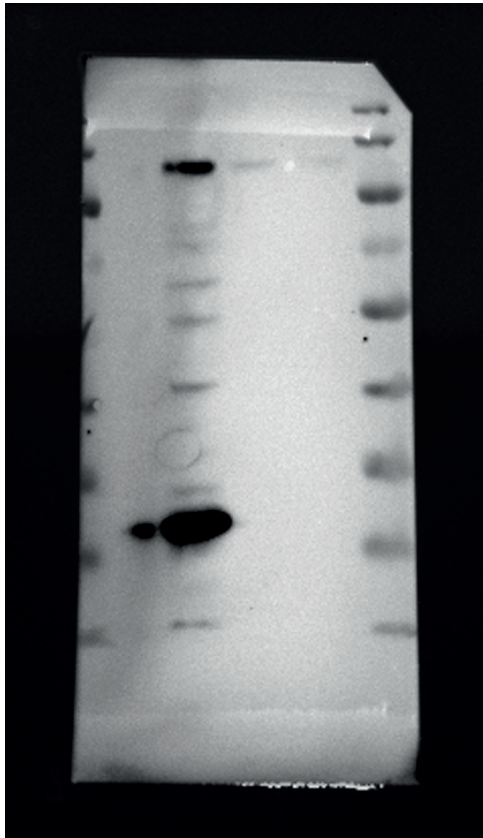

anti-NLRP3  
high exposure

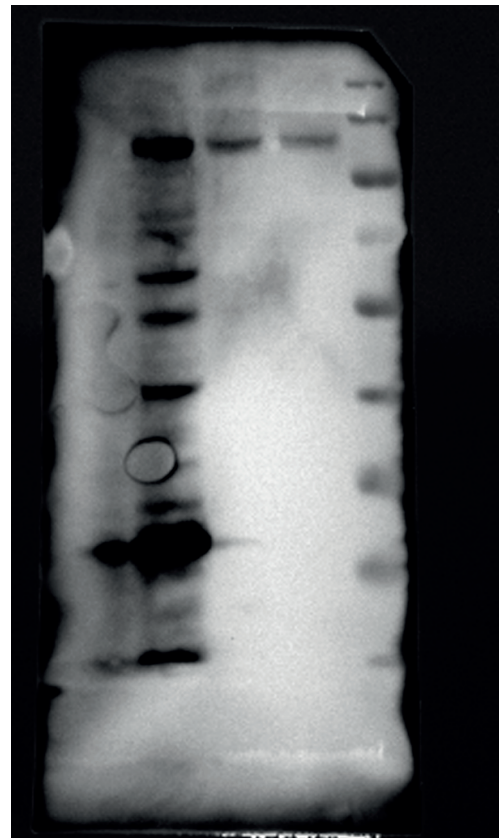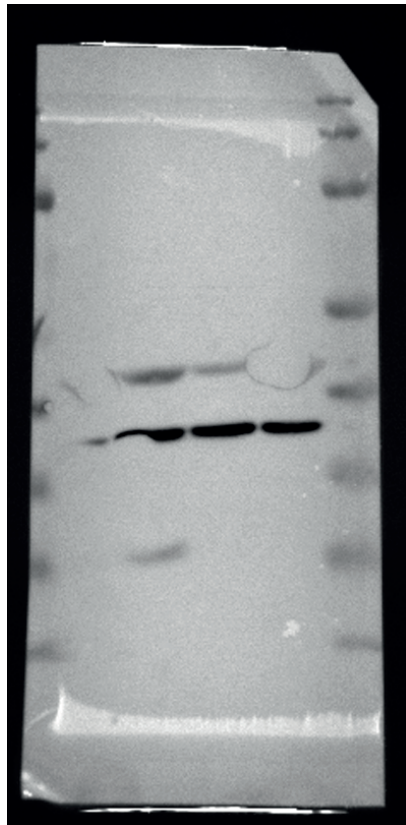

anti-GAPDH
